# Supplementary material for: A general but still unknown characteristic of active oxygen evolution electrocatalysts
Source: Royal Society of Chemistry journal article supplement (doi:10.1039/d2sc06832j), 2023-01-01
Supplement: d2sc06832j1.pdf [file d2sc06832j1.pdf]

**A general but still unknown characteristic of active oxygen evolution  
electrocatalysts†**

Eleonora Romeo,<sup>a</sup> Francesc Illas,<sup>a,\*</sup> and Federico Calle-Vallejo<sup>b,c,\*</sup>

<sup>a</sup> Department of Materials Science and Chemical Physics & Institute of Theoretical and Computational Chemistry (IQTUB), University of Barcelona, C/ Martí i Franquès 1, 08028 Barcelona, Spain.

<sup>b</sup> Nano-Bio Spectroscopy Group and European Theoretical Spectroscopy Facility (ETSF), Department of Polymers and Advanced Materials: Physics, Chemistry and Technology, University of the Basque Country UPV/EHU, Av. Tolosa 72, 20018 San Sebastián, Spain.

<sup>c</sup> IKERBASQUE, Basque Foundation for Science, Plaza de Euskadi 5, 48009 Bilbao, Spain.

\*Corresponding authors: FI ([francesc.illas@ub.edu](mailto:francesc.illas@ub.edu)) and FCV ([federico.calle@ehu.es](mailto:federico.calle@ehu.es))

**Table of Contents**

|                                               |          |
|-----------------------------------------------|----------|
| <b>S1. Data collected from the literature</b> | <b>2</b> |
| <b>S2. Free-energy span model</b>             | <b>8</b> |
| <b>References</b>                             | <b>9</b> |

**S1. Data collected from the literature**

We report in Tables S1 to S3 all the data collected from the literature, grouped by the number of electrochemical steps above 1.23 eV, i.e.  $n = 1, 2, 3$ . For each material, we specify the family it belongs to, as it is plotted in Figure 1 in the main text, with the relative color: BaNiO<sub>x</sub><sup>1</sup> in purple; single atom catalysts (SACs)<sup>2,3</sup> in light green; LSNMR<sup>2</sup> in brown; MO in light blue, LaMO<sub>3</sub> and SrMO<sub>3</sub><sup>3-5</sup> in red and dark green; Sr<sub>2</sub>MIrO<sub>6</sub><sup>6</sup> in magenta; Sr<sub>x</sub>Na<sub>y</sub>RuO<sub>3</sub><sup>7</sup> in gray; undoped and doped TiO<sub>2</sub><sup>8</sup> in blue; porphyrins<sup>9</sup> in orange; and MO<sub>2</sub><sup>4</sup> in black.

The class of materials labelled BaNiO<sub>x</sub> includes two Ba-Ni-O phases, BaNiO<sub>2</sub> and BaNiO<sub>2.78</sub>, with Ni atoms in square-planar and octahedral coordination, respectively.<sup>1</sup> SACs consist of 26 functionalized graphitic layers with MN<sub>4</sub> sites in which M = Cr, Mn, Fe, Co, Ni, Cu, Ru, Rh, Pd, Ag, Ir, Pt, Au. We note that there are two types of environments around those sites.<sup>2,3</sup> LSNMR is an acronym describing the double perovskite La<sub>1.5</sub>Sr<sub>0.5</sub>NiMn<sub>0.5</sub>Ru<sub>0.5</sub>O<sub>6</sub>, a bifunctional OER/ORR catalyst belonging to the family of doped AA'BB'O<sub>6</sub> with different cations in the A and B sublattices, in this particular case La and Sr cations occupy the A and A' positions and Ni, Mn, and Ru cations occupy the B and B' positions.<sup>2</sup> MO are metal monoxides in the rock-salt geometry while LaMO<sub>3</sub> and SrMO<sub>3</sub> are perovskite oxides (AMO<sub>3</sub>) with Sc, Ti, V, Cr, Mn, Fe, Co, Ni, Cu, Zn, Ru, Ga and Ge in the M position.<sup>3-5</sup> As part of the perovskite family, we also report Sr<sub>2</sub>MIrO<sub>6</sub> which is a double perovskite,<sup>6</sup> and Sr<sub>x</sub>Na<sub>y</sub>RuO<sub>3</sub><sup>7</sup> which is a Na-doped ruthenium perovskite. The category “doped TiO<sub>2</sub>” is composed of rutile TiO<sub>2</sub>(110) with and without surface doping of V, Nb, Ta, Cr, Mo, W, Mn, Fe, Ru, Ir and Ni.<sup>10</sup> The porphyrin catalysts considered here have Cr, Mn, Fe, Co, Ni and Cu as metal center and -H, -F, -OH, -NH<sub>2</sub>, -CH<sub>3</sub>, and -BH<sub>2</sub> as ring ligands.<sup>11</sup> Lastly, we considered some dioxide materials, MO<sub>2</sub>.<sup>6</sup>

**Table S1.** Free adsorption energy of adsorption (in eV) of \*O, \*OH and \*OOH,  $ESSI$  (in V), a metric for the breaking of the \*OOH-\*OH scaling relation  $\gamma_{OOH/OH}$  (in V), OER overpotential  $\eta_{OER}$  for materials with  $n = 1$ , I and II are 1.23 and 1.60 V vs RHE, respectively.

| Material                  | family               | $\Delta G_O$ | $\Delta G_{OH}$ | $\Delta G_{OOH}$ | $ESSI$ | $\gamma_{OOH/OH}$ | $\eta_{OER}$ | $G_{max}(I)$ | $G_{max}(II)$ | span |
|---------------------------|----------------------|--------------|-----------------|------------------|--------|-------------------|--------------|--------------|---------------|------|
| V-TiO <sub>2</sub> (6cM)  | u/d TiO <sub>2</sub> | 2.76         | 0.38            | 3.97             | 1.15   | 0.57              | 1.15         | 1.15         | 0.78          | 8    |
| V-TiO <sub>2</sub> (6cM)  | u/d TiO <sub>2</sub> | 3.40         | 1.02            | 4.56             | 1.15   | 0.54              | 1.15         | 1.15         | 0.78          | 8    |
| V-TiO <sub>2</sub> (6cM)  | u/d TiO <sub>2</sub> | 3.46         | 1.12            | 4.63             | 1.11   | 0.53              | 1.11         | 1.11         | 0.74          | 8    |
| Nb-TiO <sub>2</sub> (6cM) | u/d TiO <sub>2</sub> | 2.69         | 0.29            | 3.80             | 1.17   | 0.53              | 1.17         | 1.17         | 0.80          | 8    |
| Mo-TiO <sub>2</sub> (5cM) | u/d TiO <sub>2</sub> | 0.49         | 0.42            | 3.72             | 2.00   | 0.42              | 2.00         | 2.00         | 1.63          | 5    |
| Mo-TiO <sub>2</sub> (5cM) | u/d TiO <sub>2</sub> | 1.46         | 0.61            | 4.16             | 1.47   | 0.55              | 1.47         | 1.47         | 1.10          | 5    |
| Mo-TiO <sub>2</sub> (6cM) | u/d TiO <sub>2</sub> | 0.86         | 0.28            | 3.83             | 1.74   | 0.55              | 1.74         | 1.74         | 1.37          | 5    |
| W-TiO <sub>2</sub> (5cM)  | u/d TiO <sub>2</sub> | 0.42         | 0.34            | 3.90             | 2.25   | 0.55              | 2.25         | 2.25         | 1.88          | 5    |
| Ru-TiO <sub>2</sub> (5cM) | u/d TiO <sub>2</sub> | 2.15         | 1.05            | 4.19             | 0.81   | 0.34              | 0.81         | 0.81         | 0.44          | 5    |
| Mn-F                      | porphyrins           | 1.13         | 0.46            | 3.70             | 1.34   | 0.39              | 1.34         | 1.34         | 0.97          | 5    |
| Mn-BH <sub>2</sub>        | porphyrins           | 1.41         | 0.75            | 3.94             | 1.30   | 0.37              | 1.30         | 1.30         | 0.93          | 5    |
| Fe-H                      | porphyrins           | 1.19         | 0.63            | 3.77             | 1.35   | 0.34              | 1.35         | 1.35         | 0.98          | 5    |
| Fe-F                      | porphyrins           | 1.37         | 0.68            | 3.85             | 1.25   | 0.36              | 1.25         | 1.25         | 0.88          | 5    |
| Fe-CH <sub>3</sub>        | porphyrins           | 1.10         | 0.57            | 3.73             | 1.40   | 0.35              | 1.40         | 1.40         | 1.03          | 5    |
| Fe-BH <sub>2</sub>        | porphyrins           | 1.51         | 0.88            | 4.09             | 1.35   | 0.38              | 1.35         | 0.56         | 0.19          | 5    |
| Co-H                      | porphyrins           | 2.30         | 1.21            | 4.09             | 0.56   | 0.21              | 0.56         | 0.89         | 0.52          | 5    |
| Co-F                      | porphyrins           | 1.97         | 1.04            | 4.09             | 0.89   | 0.30              | 0.89         | 1.07         | 0.70          | 5    |
| Co-OH                     | porphyrins           | 1.65         | 0.88            | 3.95             | 1.07   | 0.31              | 1.07         | 0.70         | 0.33          | 5    |
| Co-CH <sub>3</sub>        | porphyrins           | 2.14         | 1.00            | 4.07             | 0.70   | 0.31              | 0.70         | 1.37         | 1.00          | 5    |
| Co-NH <sub>2</sub>        | porphyrins           | 1.26         | 0.77            | 3.86             | 1.37   | 0.32              | 1.37         | 1.84         | 1.47          | 5    |
| SrCrO <sub>3</sub>        | SrMO <sub>3</sub>    | 0.92         | 0.75            | 3.99             | 1.84   | 0.39              | 1.84         | 0.89         | 0.52          | 5    |
| SrMnO <sub>3</sub>        | SrMO <sub>3</sub>    | 2.29         | 1.21            | 4.41             | 0.89   | 0.37              | 0.89         | 0.60         | 0.23          | 5    |
| SrRuO <sub>3</sub>        | SrMO <sub>3</sub>    | 2.26         | 1.11            | 4.09             | 0.60   | 0.26              | 0.60         | 1.77         | 1.40          | 2    |
| LaCrO <sub>3</sub>        | LaMO <sub>3</sub>    | 0.69         | 0.56            | 3.69             | 1.77   | 0.34              | 1.77         | 1.23         | 0.86          | 5    |
| LaMnO <sub>3</sub>        | LaMO <sub>3</sub>    | 1.39         | 0.65            | 3.85             | 1.23   | 0.37              | 1.23         | 0.64         | 0.27          | 5    |
| LaRuO <sub>3</sub>        | LaMO <sub>3</sub>    | 1.87         | 0.74            | 3.74             | 0.64   | 0.27              | 0.64         | 0.71         | 0.34          | 5    |
| CoO                       | MO                   | 1.98         | 0.78            | 3.92             | 0.71   | 0.34              | 0.71         | 0.96         | 0.59          | 5    |
| Mn-FGM                    | SACs                 | 1.89         | 0.88            | 4.08             | 0.96   | 0.37              | 0.96         | 0.77         | 0.40          | 5    |
| Fe-FGM                    | SACs                 | 2.11         | 1.03            | 4.11             | 0.77   | 0.31              | 0.77         | 0.48         | 0.11          | 8    |
| Co-FGM                    | SACs                 | 2.93         | 1.22            | 4.11             | 0.48   | 0.22              | 0.48         | 0.93         | 0.56          | 8    |
| LSNMR@Mn                  | LSNMR                | 3.12         | 0.96            | 4.08             | 0.93   | 0.33              | 0.93         | 0.64         | 0.27          | 5    |
| PtO <sub>2</sub>          | rutile               | 2.35         | 1.21            | 4.22             | 0.64   | 0.28              | 0.64         | 1.35         | 0.98          | 5    |

**Table S2.** Free adsorption energy of adsorption (in eV) of \*O, \*OH and \*OOH,  $ESSI$  (in V), a metric for the breaking of the \*OOH-\*OH scaling relation  $\gamma_{OOH/OH}$  (in V), OER overpotential  $\eta_{OER}$  for materials with  $n = 2$ , I and II are 1.23 and 1.60 V vs RHE, respectively.

| material                  | family               | $\Delta G_O$ | $\Delta G_{OH}$ | $\Delta G_{OOH}$ | $ESSI$ | $\gamma_{OOH/OH}$ | $\eta_{OER}$ | $G_{max}(I)$ | $G_{max}(II)$ | span |
|---------------------------|----------------------|--------------|-----------------|------------------|--------|-------------------|--------------|--------------|---------------|------|
| TiO <sub>2</sub>          | u/d TiO <sub>2</sub> | 4.60         | 2.07            | 5.08             | 1.07   | 0.28              | 1.30         | 2.14         | 1.40          | 9    |
| V-TiO <sub>2</sub> (5cM)  | u/d TiO <sub>2</sub> | 2.35         | 1.38            | 4.50             | 0.54   | 0.33              | 0.92         | 0.92         | 0.55          | 5    |
| V-TiO <sub>2</sub> (5cM)  | u/d TiO <sub>2</sub> | 3.17         | 1.18            | 4.67             | 0.52   | 0.52              | 0.76         | 1.03         | 0.39          | 6    |
| Nb-TiO <sub>2</sub> (5cM) | u/d TiO <sub>2</sub> | 2.14         | 0.23            | 3.74             | 0.53   | 0.53              | 0.68         | 1.05         | 0.31          | 6    |
| Nb-TiO <sub>2</sub> (6cM) | u/d TiO <sub>2</sub> | 2.38         | 0.05            | 3.59             | 0.60   | 0.54              | 1.10         | 1.18         | 0.73          | 3    |
| Ta-TiO <sub>2</sub> (6cM) | u/d TiO <sub>2</sub> | 2.17         | -0.35           | 3.37             | 0.81   | 0.63              | 1.29         | 1.58         | 0.92          | 3    |
| Ta-TiO <sub>2</sub> (6cM) | u/d TiO <sub>2</sub> | 2.55         | 0.13            | 3.64             | 0.62   | 0.53              | 1.20         | 1.20         | 0.83          | 8    |
| Cr-TiO <sub>2</sub> (5cM) | u/d TiO <sub>2</sub> | 2.43         | 1.85            | 4.87             | 0.92   | 0.28              | 1.21         | 1.21         | 0.84          | 5    |
| Cr-TiO <sub>2</sub> (6cM) | u/d TiO <sub>2</sub> | 2.91         | 1.23            | 4.76             | 0.54   | 0.54              | 0.62         | 1.07         | 0.33          | 6    |
| Cr-TiO <sub>2</sub> (6cM) | u/d TiO <sub>2</sub> | 4.14         | 1.72            | 5.23             | 0.84   | 0.53              | 1.19         | 1.68         | 0.94          | 9    |
| Cr-TiO <sub>2</sub> (6cM) | u/d TiO <sub>2</sub> | 3.84         | 1.56            | 5.04             | 0.69   | 0.51              | 1.05         | 1.38         | 0.68          | 9    |
| Mo-TiO <sub>2</sub> (6cM) | u/d TiO <sub>2</sub> | 2.18         | 0.62            | 4.17             | 0.55   | 0.55              | 0.76         | 1.09         | 0.39          | 6    |
| Mo-TiO <sub>2</sub> (6cM) | u/d TiO <sub>2</sub> | 2.35         | 0.58            | 4.10             | 0.53   | 0.53              | 0.54         | 1.06         | 0.32          | 6    |
| W-TiO <sub>2</sub> (5cM)  | u/d TiO <sub>2</sub> | -0.33        | -0.23           | 3.16             | 1.40   | 0.47              | 2.26         | 2.79         | 2.05          | 2    |
| W-TiO <sub>2</sub> (6cM)  | u/d TiO <sub>2</sub> | 0.26         | 0.05            | 3.50             | 1.10   | 0.50              | 2.01         | 2.20         | 1.64          | 2    |
| W-TiO <sub>2</sub> (6cM)  | u/d TiO <sub>2</sub> | 1.16         | 0.05            | 3.60             | 0.65   | 0.55              | 1.21         | 1.30         | 0.84          | 2    |
| W-TiO <sub>2</sub> (6cM)  | u/d TiO <sub>2</sub> | 1.46         | 0.21            | 3.71             | 0.52   | 0.52              | 1.02         | 1.04         | 0.65          | 6    |
| Mn-TiO <sub>2</sub> (5cM) | u/d TiO <sub>2</sub> | 4.22         | 2.06            | 5.07             | 0.88   | 0.28              | 0.93         | 1.76         | 1.02          | 9    |
| Mn-TiO <sub>2</sub> (6cM) | u/d TiO <sub>2</sub> | 4.20         | 1.94            | 5.09             | 0.87   | 0.35              | 1.03         | 1.74         | 1.00          | 9    |
| Mn-TiO <sub>2</sub> (6cM) | u/d TiO <sub>2</sub> | 4.50         | 2.01            | 5.07             | 1.02   | 0.30              | 1.26         | 2.04         | 1.30          | 9    |
| Mn-TiO <sub>2</sub> (6cM) | u/d TiO <sub>2</sub> | 4.48         | 2.01            | 5.10             | 1.01   | 0.32              | 1.24         | 2.02         | 1.28          | 9    |
| Fe-TiO <sub>2</sub> (5cM) | u/d TiO <sub>2</sub> | 3.73         | 2.10            | 4.95             | 0.64   | 0.20              | 0.87         | 1.27         | 0.53          | 9    |
| Fe-TiO <sub>2</sub> (5cM) | u/d TiO <sub>2</sub> | 4.31         | 2.16            | 5.10             | 0.93   | 0.24              | 0.93         | 1.85         | 1.11          | 9    |
| Fe-TiO <sub>2</sub> (6cM) | u/d TiO <sub>2</sub> | 3.98         | 1.55            | 5.06             | 0.76   | 0.53              | 1.20         | 1.52         | 0.83          | 9    |
| Fe-TiO <sub>2</sub> (5cM) | u/d TiO <sub>2</sub> | 3.88         | 1.50            | 4.94             | 0.71   | 0.49              | 1.15         | 1.42         | 0.78          | 9    |
| Ru-TiO <sub>2</sub> (6cM) | u/d TiO <sub>2</sub> | 2.98         | 0.49            | 4.53             | 0.79   | 0.79              | 1.26         | 1.58         | 0.89          | 6    |
| Ru-TiO <sub>2</sub> (6cM) | u/d TiO <sub>2</sub> | 3.83         | 1.42            | 4.96             | 0.69   | 0.54              | 1.18         | 1.37         | 0.81          | 9    |
| Ru-TiO <sub>2</sub> (6cM) | u/d TiO <sub>2</sub> | 3.90         | 1.47            | 4.95             | 0.72   | 0.51              | 1.20         | 1.44         | 0.83          | 9    |
| Ir-TiO <sub>2</sub> (5cM) | u/d TiO <sub>2</sub> | 1.81         | 0.61            | 3.68             | 0.33   | 0.31              | 0.64         | 0.65         | 0.27          | 2    |
| Ir-TiO <sub>2</sub> (5cM) | u/d TiO <sub>2</sub> | 3.45         | 1.75            | 4.68             | 0.50   | 0.24              | 0.52         | 0.99         | 0.25          | 7    |
| Ir-TiO <sub>2</sub> (6cM) | u/d TiO <sub>2</sub> | 2.72         | 1.13            | 4.64             | 0.53   | 0.53              | 0.69         | 1.05         | 0.32          | 6    |
| Ir-TiO <sub>2</sub> (6cM) | u/d TiO <sub>2</sub> | 3.78         | 1.44            | 4.94             | 0.66   | 0.52              | 1.11         | 1.32         | 0.74          | 9    |
| Ir-TiO <sub>2</sub> (6cM) | u/d TiO <sub>2</sub> | 3.64         | 1.35            | 4.86             | 0.59   | 0.53              | 1.06         | 1.18         | 0.69          | 9    |
| Ni-TiO <sub>2</sub> (5cM) | u/d TiO <sub>2</sub> | 4.55         | 2.03            | 4.80             | 1.05   | 0.16              | 1.29         | 2.09         | 1.35          | 9    |
| Ni-TiO <sub>2</sub> (5cM) | u/d TiO <sub>2</sub> | 4.59         | 2.39            | 5.12             | 1.06   | 0.14              | 1.16         | 2.13         | 1.39          | 9    |
| Ni-TiO <sub>2</sub> (6cM) | u/d TiO <sub>2</sub> | 4.27         | 2.03            | 5.31             | 0.91   | 0.41              | 1.01         | 1.81         | 1.07          | 9    |
| Ni-TiO <sub>2</sub> (6cM) | u/d TiO <sub>2</sub> | 4.57         | 2.08            | 5.08             | 1.06   | 0.27              | 1.26         | 2.11         | 1.37          | 9    |
| Ni-TiO <sub>2</sub> (6cM) | u/d TiO <sub>2</sub> | 4.47         | 2.04            | 5.06             | 1.01   | 0.28              | 1.20         | 2.01         | 1.27          | 9    |
| Cr-H                      | porphyrins           | 0.85         | 0.26            | 3.53             | 0.81   | 0.41              | 1.45         | 1.61         | 1.08          | 2    |

*Electronic Supplementary Information*

|                    |                   |       |       |      |      |      |      |      |      |   |
|--------------------|-------------------|-------|-------|------|------|------|------|------|------|---|
| Cr-F               | porphyrins        | 1.00  | 0.38  | 3.63 | 0.73 | 0.40 | 1.40 | 1.46 | 1.03 | 2 |
| Cr-OH              | porphyrins        | 0.76  | 0.22  | 3.49 | 0.85 | 0.41 | 1.50 | 1.70 | 1.13 | 2 |
| Cr-CH <sub>3</sub> | porphyrins        | 0.61  | 0.18  | 3.33 | 0.93 | 0.35 | 1.49 | 1.85 | 1.12 | 2 |
| Cr-BH <sub>2</sub> | porphyrins        | 0.94  | 0.36  | 3.58 | 0.76 | 0.38 | 1.41 | 1.52 | 1.04 | 2 |
| Cr-NH <sub>2</sub> | porphyrins        | 0.60  | 0.10  | 3.33 | 0.93 | 0.39 | 1.50 | 1.86 | 1.13 | 2 |
| Mn-H               | porphyrins        | 0.93  | 0.27  | 3.53 | 0.77 | 0.40 | 1.37 | 1.53 | 1.00 | 2 |
| Mn-OH              | porphyrins        | 0.74  | 0.23  | 3.51 | 0.86 | 0.41 | 1.54 | 1.72 | 1.17 | 2 |
| Mn-CH <sub>3</sub> | porphyrins        | 0.74  | 0.18  | 3.39 | 0.86 | 0.38 | 1.42 | 1.72 | 1.05 | 2 |
| Mn-NH <sub>2</sub> | porphyrins        | 0.46  | -0.05 | 3.18 | 1.00 | 0.39 | 1.49 | 2.00 | 1.26 | 2 |
| Fe-OH              | porphyrins        | 1.07  | 0.48  | 3.62 | 0.70 | 0.34 | 1.32 | 1.39 | 0.95 | 2 |
| Fe-NH <sub>2</sub> | porphyrins        | 0.89  | 0.34  | 3.45 | 0.79 | 0.33 | 1.33 | 1.57 | 0.96 | 2 |
| Co-BH <sub>2</sub> | porphyrins        | 2.47  | 1.24  | 4.29 | 0.30 | 0.30 | 0.59 | 0.60 | 0.22 | 7 |
| Ni-H               | porphyrins        | 3.66  | 1.82  | 4.85 | 0.60 | 0.29 | 0.61 | 1.20 | 0.46 | 9 |
| Ni-CH <sub>3</sub> | porphyrins        | 3.82  | 1.84  | 4.60 | 0.68 | 0.15 | 0.75 | 1.36 | 0.62 | 9 |
| Ni-BH <sub>2</sub> | porphyrins        | 3.85  | 1.93  | 4.78 | 0.70 | 0.20 | 0.70 | 1.39 | 0.65 | 9 |
| Cu-H               | porphyrins        | 4.12  | 2.07  | 5.07 | 0.83 | 0.27 | 0.84 | 1.66 | 0.92 | 9 |
| Cu-F               | porphyrins        | 4.15  | 2.04  | 5.01 | 0.85 | 0.26 | 0.88 | 1.69 | 0.95 | 9 |
| Cu-CH <sub>3</sub> | porphyrins        | 3.76  | 1.83  | 4.89 | 0.65 | 0.30 | 0.70 | 1.30 | 0.56 | 9 |
| Cu-BH <sub>2</sub> | porphyrins        | 4.61  | 1.78  | 4.99 | 1.08 | 0.37 | 1.61 | 2.15 | 1.41 | 9 |
| Cu-NH <sub>2</sub> | porphyrins        | 2.69  | 0.92  | 4.48 | 0.55 | 0.55 | 0.56 | 1.10 | 0.36 | 6 |
| SrScO <sub>3</sub> | SrMO <sub>3</sub> | 5.23  | 2.38  | 5.21 | 1.39 | 0.19 | 1.62 | 2.77 | 2.03 | 9 |
| SrTiO <sub>3</sub> | SrMO <sub>3</sub> | 3.91  | 1.61  | 4.90 | 0.73 | 0.42 | 1.07 | 1.45 | 0.71 | 9 |
| SrVO <sub>3</sub>  | SrMO <sub>3</sub> | -0.07 | 0.13  | 3.35 | 1.27 | 0.38 | 2.19 | 2.53 | 1.82 | 2 |
| SrNiO <sub>3</sub> | SrMO <sub>3</sub> | 3.84  | 2.17  | 4.92 | 0.69 | 0.15 | 0.94 | 1.38 | 0.64 | 9 |
| SrCuO <sub>3</sub> | SrMO <sub>3</sub> | 4.75  | 2.32  | 5.31 | 1.15 | 0.27 | 1.20 | 2.29 | 1.55 | 9 |
| SrZnO <sub>3</sub> | SrMO <sub>3</sub> | 5.16  | 2.56  | 5.40 | 1.35 | 0.19 | 1.37 | 2.70 | 1.96 | 9 |
| SrGeO <sub>3</sub> | SrMO <sub>3</sub> | 4.44  | 1.74  | 5.22 | 0.99 | 0.51 | 1.47 | 1.98 | 1.24 | 9 |
| LaScO <sub>3</sub> | LaMO <sub>3</sub> | 4.80  | 1.82  | 4.88 | 1.17 | 0.30 | 1.75 | 2.34 | 1.60 | 9 |
| LaTiO <sub>3</sub> | LaMO <sub>3</sub> | -1.82 | -1.16 | 2.23 | 2.14 | 0.47 | 2.82 | 4.28 | 3.54 | 2 |
| LaVO <sub>3</sub>  | LaMO <sub>3</sub> | -0.74 | -0.22 | 2.95 | 1.60 | 0.36 | 2.46 | 3.20 | 2.46 | 2 |
| LaCoO <sub>3</sub> | LaMO <sub>3</sub> | 2.22  | 1.49  | 4.50 | 0.66 | 0.28 | 1.05 | 1.05 | 0.68 | 5 |
| LaCuO <sub>3</sub> | LaMO <sub>3</sub> | 4.92  | 2.42  | 5.39 | 1.23 | 0.26 | 1.27 | 2.46 | 1.72 | 9 |
| LaZnO <sub>3</sub> | LaMO <sub>3</sub> | 5.18  | 2.48  | 5.27 | 1.36 | 0.17 | 1.47 | 2.72 | 1.98 | 9 |
| LaGaO <sub>3</sub> | LaMO <sub>3</sub> | 4.88  | 1.95  | 5.02 | 1.21 | 0.31 | 1.70 | 2.42 | 1.68 | 9 |
| CaO                | MO                | 5.38  | 2.32  | 5.04 | 1.46 | 0.13 | 1.83 | 2.92 | 2.18 | 9 |
| ScO                | MO                | -0.90 | -1.52 | 1.98 | 1.68 | 0.52 | 1.71 | 3.36 | 2.62 | 2 |
| TiO                | MO                | -1.61 | -1.05 | 2.32 | 2.04 | 0.46 | 2.70 | 4.07 | 3.33 | 2 |
| VO                 | MO                | -0.94 | -0.71 | 2.56 | 1.70 | 0.41 | 2.27 | 3.40 | 2.66 | 2 |
| CrO                | MO                | 0.22  | -0.13 | 2.90 | 1.12 | 0.29 | 1.45 | 2.24 | 1.50 | 2 |
| MnO                | MO                | 1.42  | 0.42  | 3.66 | 0.52 | 0.39 | 1.01 | 1.04 | 0.64 | 2 |
| FeO                | MO                | 1.76  | 0.38  | 3.75 | 0.46 | 0.46 | 0.76 | 0.91 | 0.39 | 6 |
| NiO                | MO                | 2.49  | 1.03  | 4.12 | 0.32 | 0.32 | 0.40 | 0.63 | 0.03 | 6 |
| CuO                | MO                | 3.93  | 2.00  | 4.75 | 0.74 | 0.15 | 0.77 | 1.47 | 0.73 | 9 |
| Cr-FGM             | SACs              | 0.89  | 0.35  | 3.60 | 0.79 | 0.40 | 1.48 | 1.57 | 1.11 | 2 |

*Electronic Supplementary Information*

|                                                                 |                                                  |      |      |      |      |      |      |      |      |   |
|-----------------------------------------------------------------|--------------------------------------------------|------|------|------|------|------|------|------|------|---|
| Ni-FGM                                                          | SACs                                             | 4.16 | 2.14 | 4.91 | 0.85 | 0.16 | 0.91 | 1.70 | 0.96 | 9 |
| Cu-FGM                                                          | SACs                                             | 4.52 | 2.31 | 5.11 | 1.03 | 0.17 | 1.08 | 2.06 | 1.32 | 9 |
| Ru-FGM                                                          | SACs                                             | 1.72 | 0.58 | 3.63 | 0.37 | 0.30 | 0.68 | 0.74 | 0.31 | 2 |
| Rh-FGM                                                          | SACs                                             | 2.84 | 1.23 | 4.19 | 0.25 | 0.25 | 0.38 | 0.50 | 0.01 | 6 |
| Pd-FGM                                                          | SACs                                             | 4.65 | 2.50 | 5.08 | 1.10 | 0.06 | 1.27 | 2.19 | 1.45 | 9 |
| Ag-FGM                                                          | SACs                                             | 4.77 | 2.52 | 5.12 | 1.16 | 0.07 | 1.29 | 2.31 | 1.57 | 9 |
| Ir-FGM                                                          | SACs                                             | 2.41 | 1.24 | 4.26 | 0.32 | 0.28 | 0.62 | 0.62 | 0.25 | 5 |
| Pt-FGM                                                          | SACs                                             | 4.61 | 2.42 | 5.11 | 1.08 | 0.12 | 1.19 | 2.15 | 1.41 | 9 |
| Au-FGM                                                          | SACs                                             | 4.84 | 2.62 | 5.11 | 1.19 | 0.02 | 1.39 | 2.38 | 1.64 | 9 |
| BaNiO <sub>3</sub>                                              | BaNiO <sub>x</sub>                               | 3.88 | 1.87 | 4.99 | 0.71 | 0.33 | 0.78 | 1.42 | 0.68 | 9 |
| BaNiO <sub>3-d2</sub>                                           | BaNiO <sub>x</sub>                               | 3.94 | 1.78 | 5.15 | 0.74 | 0.46 | 0.93 | 1.48 | 0.74 | 9 |
| Sr <sub>5</sub> Na <sub>2</sub> Ru <sub>8</sub> O <sub>24</sub> | Sr <sub>x</sub> Na <sub>y</sub> RuO <sub>3</sub> | 2.66 | 0.94 | 4.34 | 0.47 | 0.47 | 0.49 | 0.94 | 0.20 | 6 |
| LSNMR@Ni                                                        | LSNMR                                            | 3.71 | 1.47 | 4.41 | 0.63 | 0.24 | 1.01 | 1.25 | 0.64 | 9 |
| LSNMR@Ru                                                        | LSNMR                                            | 2.27 | 0.54 | 3.89 | 0.45 | 0.45 | 0.50 | 0.89 | 0.15 | 6 |
| Sr <sub>2</sub> NiIrO <sub>6</sub>                              | Sr <sub>2</sub> MiIrO <sub>6</sub>               | 2.12 | 0.77 | 3.25 | 0.28 | 0.01 | 0.44 | 0.46 | 0.07 | 3 |
| Sr <sub>2</sub> ScIrO <sub>6</sub>                              | Sr <sub>2</sub> MiIrO <sub>6</sub>               | 1.48 | 0.41 | 3.50 | 0.49 | 0.32 | 0.79 | 0.98 | 0.42 | 2 |
| Sr <sub>2</sub> FeIrO <sub>6</sub>                              | Sr <sub>2</sub> MiIrO <sub>6</sub>               | 1.51 | 0.30 | 3.50 | 0.47 | 0.37 | 0.75 | 0.95 | 0.38 | 2 |

---

**Table S3.** Free adsorption energy of adsorption (in eV) of \*O, \*OH and \*OOH,  $ESSI$  (in V), a metric for the breaking of the \*OOH-\*OH scaling relation  $\gamma_{OOH/OH}$  (in V), OER overpotential  $\eta_{OER}$  for materials with  $n = 3$ , I and II are 1.23 and 1.60 V vs RHE, respectively.

| material                                                        | family                                           | $\Delta G_O$ | $\Delta G_{OH}$ | $\Delta G_{OOH}$ | $ESSI$ | $\gamma_{OOH/OH}$ | $\eta_{OER}$ | $G_{max}(I)$ | $G_{max}(II)$ | span |
|-----------------------------------------------------------------|--------------------------------------------------|--------------|-----------------|------------------|--------|-------------------|--------------|--------------|---------------|------|
| Nb-TiO <sub>2</sub> (5cM)                                       | u/d TiO <sub>2</sub>                             | 1.38         | -0.08           | 3.39             | 0.44   | 0.51              | 0.78         | 1.31         | 0.41          | 3    |
| Nb-TiO <sub>2</sub> (6cM)                                       | u/d TiO <sub>2</sub>                             | 2.33         | 0.10            | 3.61             | 0.38   | 0.53              | 1.00         | 1.13         | 0.63          | 3    |
| Ta-TiO <sub>2</sub> (5cM)                                       | u/d TiO <sub>2</sub>                             | 1.50         | -0.51           | 3.04             | 0.58   | 0.55              | 0.78         | 1.74         | 0.63          | 3    |
| Ta-TiO <sub>2</sub> (5cM)                                       | u/d TiO <sub>2</sub>                             | 1.86         | -0.02           | 3.52             | 0.42   | 0.54              | 0.65         | 1.25         | 0.34          | 3    |
| Ta-TiO <sub>2</sub> (6cM)                                       | u/d TiO <sub>2</sub>                             | 2.33         | 0.07            | 3.60             | 0.39   | 0.54              | 1.03         | 1.16         | 0.66          | 3    |
| Cr-TiO <sub>2</sub> (5cM)                                       | u/d TiO <sub>2</sub>                             | 3.44         | 1.61            | 5.14             | 0.48   | 0.54              | 0.60         | 1.45         | 0.34          | 7    |
| Mn-TiO <sub>2</sub> (5cM)                                       | u/d TiO <sub>2</sub>                             | 3.38         | 1.92            | 4.82             | 0.38   | 0.22              | 0.69         | 1.13         | 0.32          | 7    |
| Fe-TiO <sub>2</sub> (6cM)                                       | u/d TiO <sub>2</sub>                             | 3.81         | 1.55            | 5.06             | 0.46   | 0.53              | 1.03         | 1.37         | 0.66          | 7    |
| Ru-TiO <sub>2</sub> (5cM)                                       | u/d TiO <sub>2</sub>                             | 3.55         | 1.73            | 5.12             | 0.48   | 0.47              | 0.59         | 1.43         | 0.35          | 7    |
| Ni-F                                                            | porphyrins                                       | 3.43         | 1.85            | 4.93             | 0.41   | 0.31              | 0.62         | 1.24         | 0.25          | 7    |
| Ni-OH                                                           | porphyrins                                       | 3.21         | 1.58            | 4.78             | 0.36   | 0.37              | 0.40         | 1.09         | 0.03          | 7    |
| Ni-NH <sub>2</sub>                                              | porphyrins                                       | 3.10         | 1.32            | 4.46             | 0.26   | 0.34              | 0.55         | 0.77         | 0.18          | 7    |
| Cu-OH                                                           | porphyrins                                       | 3.69         | 1.62            | 4.94             | 0.42   | 0.43              | 0.84         | 1.25         | 0.49          | 7    |
| SrFeO <sub>3</sub>                                              | SrMO <sub>3</sub>                                | 2.98         | 1.67            | 4.70             | 0.34   | 0.29              | 0.49         | 1.01         | 0.12          | 7    |
| SrCoO <sub>3</sub>                                              | SrMO <sub>3</sub>                                | 3.00         | 1.54            | 4.44             | 0.25   | 0.22              | 0.31         | 0.75         | -0.06         | 7    |
| LaFeO <sub>3</sub>                                              | LaMO <sub>3</sub>                                | 2.74         | 1.25            | 4.55             | 0.29   | 0.42              | 0.58         | 0.86         | 0.21          | 7    |
| LaNiO <sub>3</sub>                                              | LaMO <sub>3</sub>                                | 3.09         | 1.54            | 4.61             | 0.31   | 0.31              | 0.32         | 0.92         | -0.05         | 7    |
| BaNiO <sub>3-d1</sub>                                           | BaNiO <sub>x</sub>                               | 3.54         | 1.93            | 5.00             | 0.44   | 0.31              | 0.70         | 1.31         | 0.34          | 7    |
| BaNiO <sub>2</sub>                                              | BaNiO <sub>x</sub>                               | 3.46         | 1.85            | 4.78             | 0.36   | 0.24              | 0.62         | 1.09         | 0.26          | 7    |
| Sr <sub>7/8</sub> Na <sub>1/8</sub> RuO <sub>3</sub>            | Sr <sub>x</sub> Na <sub>y</sub> RuO <sub>3</sub> | 3.16         | 1.56            | 4.43             | 0.25   | 0.21              | 0.37         | 0.74         | 0.00          | 7    |
| Sr <sub>6/8</sub> Na <sub>2/8</sub> RuO <sub>3</sub>            | Sr <sub>x</sub> Na <sub>y</sub> RuO <sub>3</sub> | 3.31         | 1.59            | 4.76             | 0.36   | 0.36              | 0.49         | 1.07         | 0.12          | 7    |
| Sr <sub>7</sub> Ru <sub>8</sub> O <sub>24</sub>                 | Sr <sub>x</sub> Na <sub>y</sub> RuO <sub>3</sub> | 3.38         | 1.58            | 5.02             | 0.44   | 0.49              | 0.57         | 1.33         | 0.24          | 7    |
| Sr <sub>6</sub> Na <sub>1</sub> Ru <sub>8</sub> O <sub>24</sub> | Sr <sub>x</sub> Na <sub>y</sub> RuO <sub>3</sub> | 3.44         | 1.62            | 4.79             | 0.37   | 0.36              | 0.59         | 1.10         | 0.24          | 7    |
| IrO <sub>2</sub>                                                | rutiles                                          | 1.65         | 0.29            | 3.45             | 0.31   | 0.35              | 0.57         | 0.94         | 0.20          | 3    |
| RuO <sub>2</sub>                                                | rutiles                                          | 2.72         | 1.35            | 4.35             | 0.22   | 0.27              | 0.40         | 0.66         | 0.03          | 7    |
| MnO <sub>2</sub>                                                | rutiles                                          | 3.20         | 1.84            | 5.04             | 0.45   | 0.37              | 0.61         | 1.35         | 0.24          | 7    |
| Sr <sub>2</sub> CoIrO <sub>6</sub>                              | Sr <sub>2</sub> MIrO <sub>6</sub>                | 1.63         | 0.00            | 3.40             | 0.41   | 0.47              | 0.54         | 1.23         | 0.20          | 3    |

**S2. Free-energy span model**

The potential-dependent free-energy spans are calculated on the basis of the adsorption energies of \*O, \*OH and \*OOH as follows:<sup>10</sup>

$$span_1(U) = \Delta G_{O_2}(U) - \Delta G_{OOH}(U) \quad (S1)$$

$$span_2(U) = \Delta G_{O_2}(U) - \Delta G_O(U) \quad (S2)$$

$$span_3(U) = \Delta G_{O_2}(U) - \Delta G_{OH}(U) \quad (S3)$$

$$span_4(U) = \Delta G_{O_2}(U) - \Delta G_{H_2O}(U) \quad (S4)$$

$$span_5(U) = \Delta G_{OOH}(U) - \Delta G_O(U) \quad (S5)$$

$$span_6 = \Delta G_{OOH}(U) - \Delta G_{OH}(U) \quad (S6)$$

$$span_7(U) = \Delta G_{OOH}(U) - \Delta G_{H_2O}(U) \quad (S7)$$

$$span_8(U) = \Delta G_O(U) - \Delta G_{OH}(U) \quad (S8)$$

$$span_9(U) = \Delta G_O(U) - \Delta G_{H_2O}(U) \quad (S9)$$

$$span_{10}(U) = \Delta G_{OH}(U) - \Delta G_{H_2O}(U) \quad (S10)$$

where  $\Delta G_{H_2O} = 0$  at all potentials and  $\Delta G_{O_2} = 4.92 \text{ eV}$  at 0 V vs RHE. The effect of the potential on the adsorption energies is evaluated by means of the computational hydrogen electrode.<sup>11</sup> The descriptor  $G_{max}(\eta)$  is calculated as the largest positive span in Equations S1-S10:

$$G_{max}(\eta) = \max (span_i(U)) \quad (S11)$$



## References

- 1 M. Retuerto, F. Calle-Vallejo, L. Pascual, P. Ferrer, Á. García, J. Torrero, D. Gianolio, J. L. G. Fierro, M. A. Peña, J. A. Alonso and S. Rojas, Role of lattice oxygen content and Ni geometry in the oxygen evolution activity of the Ba-Ni-O system, *J. Power Sources*, 2018, **404**, 56–63.
- 2 M. Retuerto, F. Calle-Vallejo, L. Pascual, G. Lumbeeck, M. T. Fernandez-Diaz, M. Croft, J. Gopalakrishnan, M. A. Peña, J. Hadermann, M. Greenblatt and S. Rojas, La<sub>1.5</sub>Sr<sub>0.5</sub>NiMn<sub>0.5</sub>Ru<sub>0.5</sub>O<sub>6</sub> Double Perovskite with Enhanced ORR/OER Bifunctional Catalytic Activity, *ACS Appl. Mater. Interfaces*, 2019, **11**, 21454–21464.
- 3 F. Calle-Vallejo, N. G. Inoglu, H. Y. Su, J. I. Martínez, I. C. Man, M. T. M. Koper, J. R. Kitchin and J. Rossmeisl, Number of outer electrons as descriptor for adsorption processes on transition metals and their oxides, *Chem. Sci.*, 2013, **4**, 1245–1249.
- 4 I. C. Man, H. Y. Su, F. Calle-Vallejo, H. A. Hansen, J. I. Martínez, N. G. Inoglu, J. Kitchin, T. F. Jaramillo, J. K. Nørskov and J. Rossmeisl, Universality in Oxygen Evolution Electrocatalysis on Oxide Surfaces, *ChemCatChem*, 2011, **3**, 1159–1165.
- 5 F. Calle-Vallejo, O. A. Díaz-Morales, M. J. Kolb and M. T. M. Koper, Why is bulk thermochemistry a good descriptor for the electrocatalytic activity of transition metal oxides?, *ACS Catal*, 2015, **5**, 869–873.
- 6 M. Retuerto, L. Pascual, O. Piqué, P. Kayser, M. A. Salam, M. Mokhtar, J. A. Alonso, M. Peña, F. Calle-Vallejo and S. Rojas, How oxidation state and lattice distortion influence the oxygen evolution activity in acid of iridium double perovskites, *J. Mater. Chem. A*, 2021, **9**, 2980–2990.
- 7 M. Retuerto, L. Pascual, F. Calle-Vallejo, P. Ferrer, D. Gianolio, A. G. Pereira, Á. García, J. Torrero, M. T. Fernández-Díaz, P. Bencok, M. A. Peña, J. L. G. Fierro and S. Rojas, Na-doped ruthenium perovskite electrocatalysts with improved oxygen evolution activity and durability in acidic media, *Nat. Commun.* 2019 10:1, 2019, **10**, 1–9.

- 8 M. García-Mota, A. Vojvodic, H. Metiu, I. C. Man, H. Y. Su, J. Rossmeisl and J. K. Nørskov, Tailoring the Activity for Oxygen Evolution Electrocatalysis on Rutile TiO<sub>2</sub>(110) by Transition-Metal Substitution, *ChemCatChem*, 2011, **3**, 1607–1611.
- 9 F. Calle-Vallejo, A. Krabbe and J. M. García-Lastra, How covalence breaks adsorption-energy scaling relations and solvation restores them, *Chem. Sci.*, 2016, **8**, 124–130.
- 10 S. Razzaq and K. S. Exner, Materials Screening by the Descriptor G<sub>max</sub>( $\eta$ ): The Free-Energy Span Model in Electrocatalysis, *ACS Catal.*, 2023, 1740–1758.
- 11 J. K. Nørskov, J. Rossmeisl, A. Logadottir, L. Lindqvist, J. R. Kitchin, T. Bligaard and H. Jónsson, Origin of the Overpotential for Oxygen Reduction at a Fuel-Cell Cathode, *J. Phys. Chem. B*, 2004, **108**, 17886–17892.
